# Supplementary material
Source: PubMed Central journal article supplement (PMC6842043)
Supplement: NIHMS1044919-supplement-Appendix.pdf [file NIHMS1044919-supplement-Appendix.pdf]

# Hired Latino Youth Farmworkers: Work Organization, Safety, Hazards, and Health

## In-depth Interview Guide

Thank you for agreeing to participate in our study of youth employed doing farm work. I would like to discuss your experiences in doing farm work, including what types of farm work you have done, your perceptions of any dangers in doing farm work, and any injuries doing farm work you have experienced or observed.

This is an interview, not a test. There are no right or wrong answers to the questions that I will ask you. Please think of this as a discussion you would have with your friends about your work experiences.

To get us started, I would like to ask some questions so that I can learn a little more about you.

### [Topics • Probes to be used, as needed]

#### Personal Characteristics

- How old are you?
- Where were you born? How long have you lived in this area?
- Please tell me about your family.
- Please tell me about your school.
- Please tell me about any activities (sports, clubs, or other school-related or school-sponsored activities) that you are involved in at school (if any).
- Please tell me about any moving or migrating that your family has experienced.
- Tell me about your health.

#### Living Situation and Conditions

- Please tell me about the community where you live
- Please tell me about your house
  - Who lives with you?
  - Tell me about your responsibilities around your house.

#### Farm Work Experience

- Tell me about the farm work that you are doing.
  - Tell me about who you work for
  - Tell me about other farmers you have worked for
- Tell me about who you normally work with
  - Family members?
  - Friends?

## **Work Organization**

- Tell me what you like about farm work.
- Tell me what you don't like about farm work.
- Tell me about the physical demands of your job doing farm work?
- Tell me about the stresses you experience doing farm work?
- How much control do you have when you work on farms to make decisions about. . .
  - How to do your job?
  - How fast to do your job?
  - When to start work and when to stop work?
  - When to take breaks? How long the breaks are?
- What kind of help and support do you receive . . .
  - Employer?
  - Crew leader?
  - Adult workers?
  - Other youth workers?
  - Family members?
- Have you ever experienced any harassment while doing your job?
- Have you ever experienced any discrimination while doing your job?

## **Work Safety Culture**

- Tell me about safety training you have received,
- Are you provided with the materials and time you need to use the training that you receive?
- Tell me how important safety is for the people you work with
  - . . . for other youth you work with
  - . . . for adults you work with
  - . . . for your crew leader
  - . . . for your boss

## **General and Work Related Risk Behavior**

Sometimes people take risks – they do things that they know might not be safe. I would like to discuss some risks people take when they are not working and when they are working.

Let's talk about what you do when you are having fun (not working).

- Do you ride a bicycle? Tell me about being safe or taking chances
  - Have you ever ridden in the back of an uncovered truck? Tell me about that.

- How often do you use a seatbelt when you drive or ride in a car?
- Have you ever ridden a motorcycle or moped?
- Have you ever ridden an all-terrain vehicle (ATV)?
- Do you ever think about smoking or drinking?

Let talk about what you do when you are working.

- Do you ever wear safety equipment when you do farm work? Tell me about that.
- What kinds of clothes and shoes do you usually wear when you do farm work and why?
- How often do you wash your hands with soap when you're doing farm work?
  - Do you ever not wash your hands when you should? If yes, when and why?
- Tell be about how you protect yourself from the sun while working outdoors.
- Tell me about your experience in working . . .
  - Heights
  - Chemicals, like pesticides
  - Heat
  - Tools
  - Machinery
  - Taking breaks

### **Occupational Injury Experience**

- Please tell me about any work injuries that you have seen happening to people working with you on a farm.
- Please tell me about any work injuries that you have heard that have happened to people who were working on a farm.
- Please tell me about any “close calls” you have experienced while working on a farm.
- Please tell me about any injuries you have had while working on a farm.
- Please tell me about any illnesses you have had from working on a farm.
- Have you ever been sunburnt?
